# Supplementary material
Source: PubMed Central journal article supplement (PMC5823011)
Supplement: NIHMS907474-supplement-2.pdf [file NIHMS907474-supplement-2.pdf]

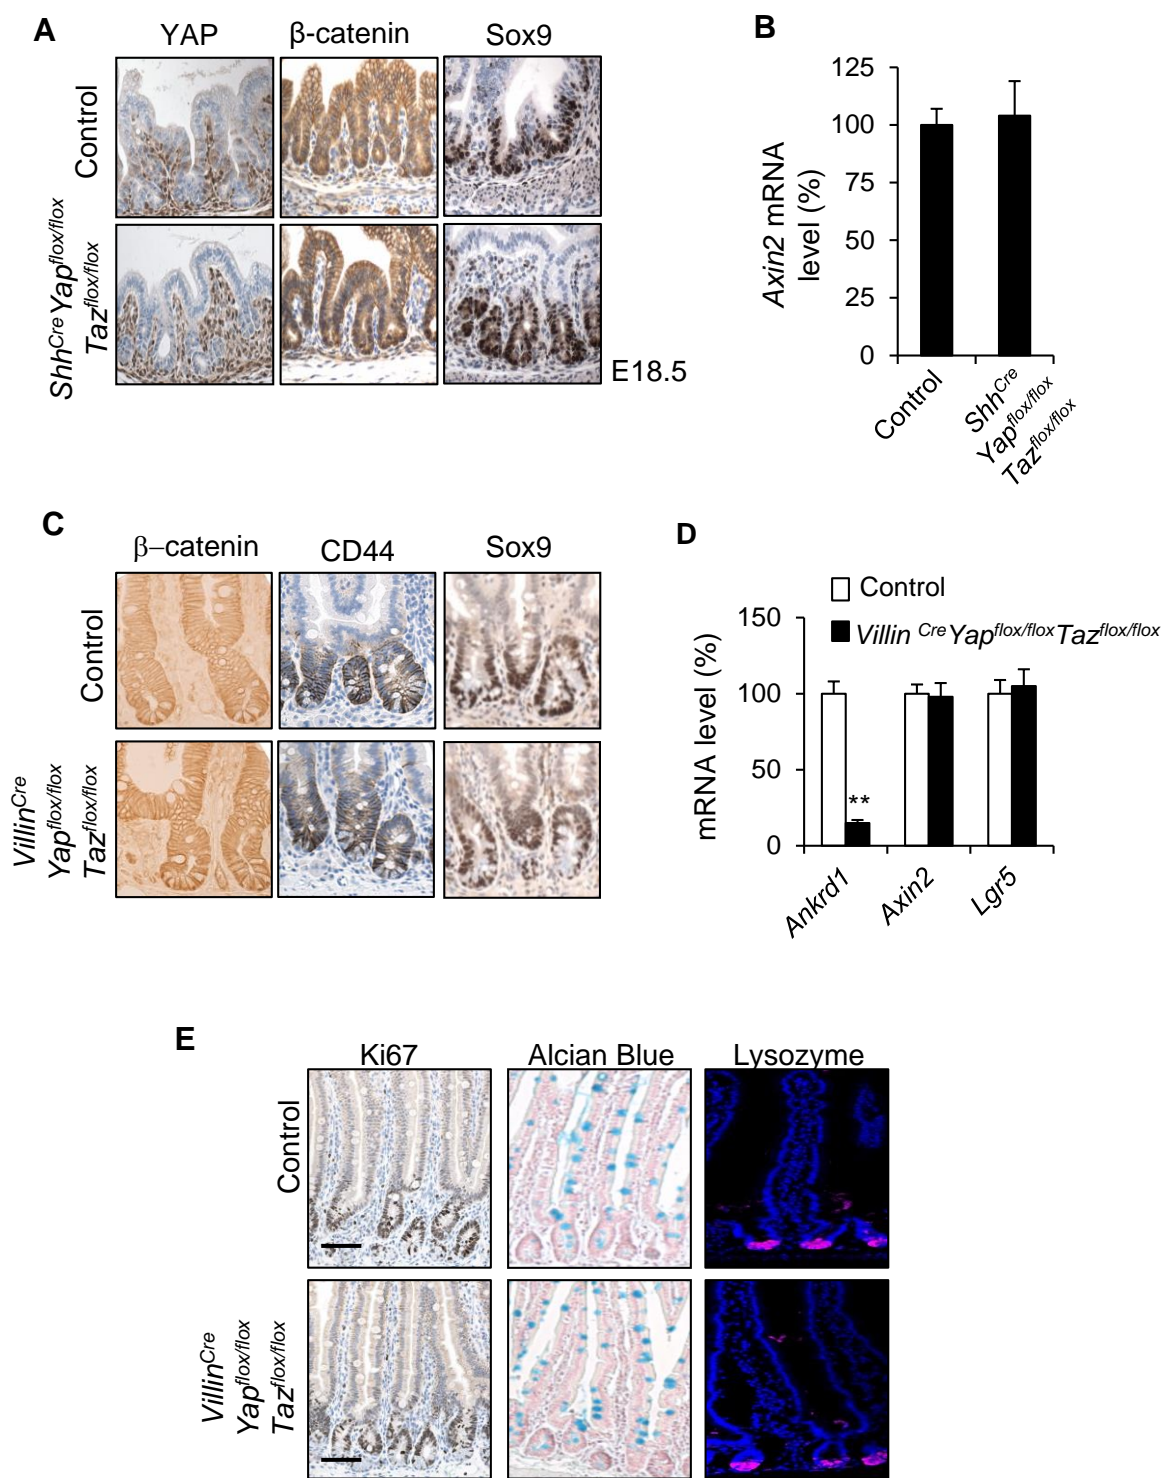

**Figure S1 (Related to Figure 1). YAP/TAZ removal does not affect Wnt signal transduction in gastrointestinal epithelium. (A)** YAP/TAZ,  $\beta$ Catenin, and CD44 immunohistochemical staining in stomach in control and *Shh<sup>Cre</sup> Yap<sup>flox/flox</sup> Taz<sup>flox/flox</sup>* animals at E18.5. **(B)** Real-time PCR analysis of *Axin2* mRNA level in stomach in control and *Shh<sup>Cre</sup> Yap<sup>flox/flox</sup> Taz<sup>flox/flox</sup>* animals at E18.5. **(C)**  $\beta$ Catenin, CD44 and Sox9 immunohistochemical staining in intestine of adult control and *Villin<sup>Cre</sup> Yap<sup>flox/flox</sup> Taz<sup>flox/flox</sup>* animals. **(D)** Real-time PCR analysis of *Ankrd1*, *Axin2* and *Lgr5* mRNA levels in intestine of adult control and *Villin<sup>Cre</sup> Yap<sup>flox/flox</sup> Taz<sup>flox/flox</sup>* animals. **(E)** Ki67 (immunohistochemical), Alcian Blue, and Lysozyme (immunofluorescence) staining in intestine of adult control and *Villin<sup>Cre</sup> Yap<sup>flox/flox</sup> Taz<sup>flox/flox</sup>* animals. Data are mean  $\pm$  S.D., \*\* = p value  $\leq$ 0.01.

**A**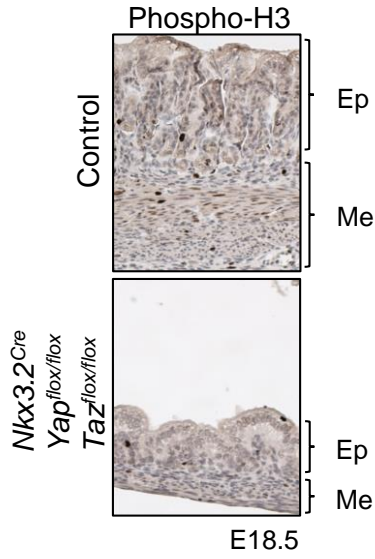**B**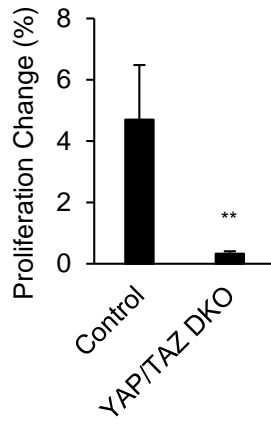**C**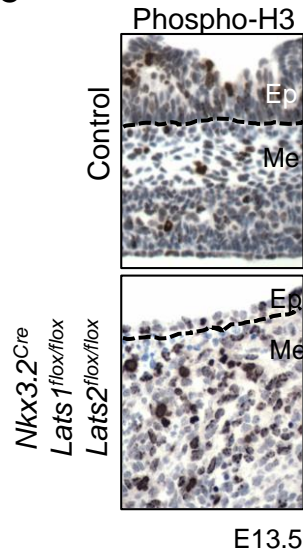**D**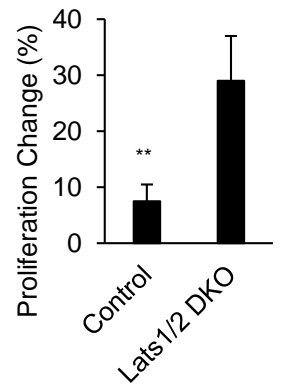**E**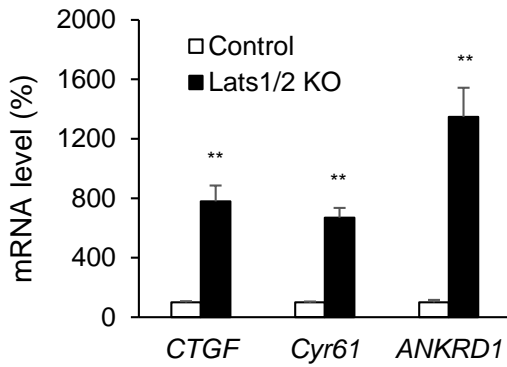**F**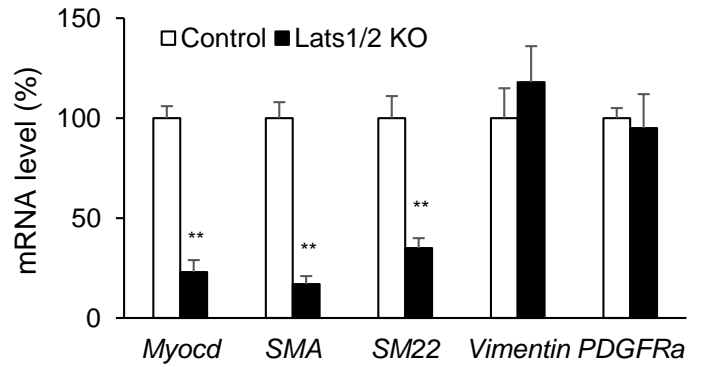**G**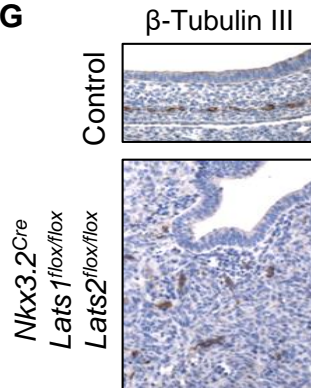

**Figure S2 (Related to Figure 2 and 4). Proliferation and differentiation in**

**Lats1/2 and YAP/TAZ mutant gut mesenchyme. (A)** phospho-H3 (pH3)

immunohistochemical staining in stomach of control and

*Nkx3.2<sup>Cre</sup>YAP<sup>flox/flox</sup>TAZ<sup>flox/flox</sup>* mutant animals at E18.5. Ep: Epithelium; Me:

Mesenchyme. (B) Quantification of fold change of mesenchymal pH3<sup>+</sup> cells in (A).

YAP/TAZ DKO: *Nkx3.2<sup>Cre</sup>YAP<sup>flox/flox</sup>TAZ<sup>flox/flox</sup>*. (C) pH3 immunohistochemical staining

in stomach of control and *Nkx3.2<sup>Cre</sup>Lats1<sup>flox/flox</sup>Lats2<sup>flox/flox</sup>* mutant animals at E13.5.

(D) Quantification of fold change of mesenchymal pH3<sup>+</sup> cells in (C). Lats1/2 DKO:

*Nkx3.2<sup>Cre</sup>Lats1<sup>flox/flox</sup>Lats2<sup>flox/flox</sup>* (E) Real-time PCR analysis of *Ctgf*, *Cyr61* and

*Ankrd1* mRNA levels in stomach of control and *Nkx3.2<sup>Cre</sup>Lats1<sup>flox/flox</sup>Lats2<sup>flox/flox</sup>*

mutant animals at E13.5. (F) Real-time PCR analysis of *Myocd*, *SMA*, *SM22*,

*Vimentin*, and *PDGFRa* mRNA levels in stomach of control and

*Nkx3.2<sup>Cre</sup>Lats1<sup>flox/flox</sup>Lats2<sup>flox/flox</sup>* mutant animals at E13.5. (G)  $\beta$ Tubulin III

immunohistochemical staining in stomach of control and

*Nkx3.2<sup>Cre</sup>Lats1<sup>flox/flox</sup>Lats2<sup>flox/flox</sup>* mutant animals at E13.5. Data are mean  $\pm$  S.D., \*\*

= p value  $\leq$ 0.01.

**Table S2: (Related to STAR\*METHOD) RT-qPCR and ChIP-qPCR Primers**

| qPCR Primers                 | Sequence                   |
|------------------------------|----------------------------|
| mouse CTGF forward           | TGTGCACTGCCAAAGATGGTGCAC   |
| mouse CTGF reverse           | TGGGCAGGCGCACGTCCATG       |
| mouse Cyr61 forward          | CAGCTCACTGAAGAGGCTTC       |
| mouse Cyr61 reverse          | GCGTGCAGAGGGTTGAAAAG       |
| mouse ANKRD1 forward         | GGAACAACGGAAAAGCGAGAA      |
| mouse ANKRD1 reverse         | GAAACCTCGGCACATCCACA       |
| mouse $\alpha$ -SMA forward  | ATTGTGCTGGACTCTGGAGATGGT   |
| mouse $\alpha$ -SMA reverse  | TGATGTCACGGACAATCTCACGCT   |
| mouse $\gamma$ -SMA forward  | GTATTTCTGCCAAAGACACCACG    |
| mouse $\gamma$ -SMA reverse  | ACATAGCTGTCTTTCTGGCCC      |
| mouse Vimentin forward       | CGGCTGCGAGAGAAATTGC        |
| mouse Vimentin reverse       | CCACTTTCCGTTCAAGGTCAAG     |
| mouse PDGFR $\alpha$ forward | CGACTCCAGATGGGAGTTCCC      |
| mouse PDGFR $\alpha$ reverse | TGCCATCCAATTACAGGCA        |
| mouse PDGFR $\beta$ forward  | AGCTACATGGCCCCTTATGA       |
| mouse PDGFR $\beta$ reverse  | GGATCCCAAAGACCAGACA        |
| mouse Hhip1 forward          | CTATTGGGCCTCACGACCAC       |
| mouse Hhip1 reverse          | TTCCAGAAACACCCTGGCTG       |
| mouse Gli1 forward           | CGCCAAGCACCAGAATCGG        |
| mouse Gli1 reverse           | CCGAGACACAAGGTCCTTCATCC    |
| mouse Ptch1 forward          | AACAAAAATTCAACCAAACCTC     |
| mouse Ptch1 reverse          | TGTCTTCATTCCAGTTGATGTG     |
| mouse Ptch2 forward          | CCCGTGGTAATCCTCGTGGCCTCTAT |
| mouse Ptch2 reverse          | TCCATCAGTCACAGGGGCAAAGGTC  |
| mouse Shh forward            | CAAAGCTCACATCCACTGTTCTG    |
| mouse Shh reverse            | GAAA CAGC CGCC GGATTT      |
| mouse Ihh forward            | CACGTGCATTGCTCTGTCAA       |
| mouse Ihh reverse            | AGGAAAGCAGCCACCTGTCTT      |
| mouse Myocd forward          | AAGGTCCATTCCAACCTGCTC      |
| mouse Myocd reverse          | CCATCTCTACTGCTGTCAATCC     |
| mouse Myh11 forward          | GAGAAAGGAAACACCAAGGTCAAGC  |
| mouse Myh11 reverse          | AACAAATGAAGCCTCCTGGTGGCTC  |
| mouse SM22 $\alpha$ forward  | CTCTAATGGCTTTGGGCAGTTTGG   |

|                                 |                                |
|---------------------------------|--------------------------------|
| mouse SM22 $\alpha$ reverse     | GCTCCTGGGCTTTCTTCATAAACC       |
| mouse Axin2 forward             | TGACTCTCCTTCCAGATCCCA          |
| mouse Axin2 reverse             | TGCCCACACTAGGCTGACA            |
| mouse Lgr5 forward              | CGGGACCTTGAAGATTCCT            |
| mouse Lgr5 reverse              | GATTCGGATCAGCCAGCTAC           |
| mouse GAPDH forward             | GTGAAGGTCGGTGTGAACG            |
| mouse GAPDH reverse             | ATTTGATGTTAGTGGGGTCTCG         |
| <b>ChIP-qPCR Primers</b>        | <b>Sequence</b>                |
| mouse Cyr61 forward             | CTCTGATGGATCTGAGAAGAGG         |
| mouse Cyr61 reverse             | GCCCTTTATAATGCCTGCCTA          |
| mouse Ctgf forward              | CAATCCGGTGTGAGTTGATG           |
| mouse Ctgf reverse              | GGCGCTGGCTTTTATACG             |
| mouse Myocd forward             | ATTCTCTGGGTTGCACCAAT           |
| mouse Myocd reverse             | AGTTGAGTAGCAGGGCTCCA           |
| mouse Myocd TSS forward         | ACTGTGCGTCCTCCTACCC            |
| mouse Myocd TSS reverse         | CCCAGAGGACAGCAGCTAAC           |
| mouse $\alpha$ -SMA forward     | AGCAGAACAGAGGAATGCAGTGGAAGAGAC |
| mouse $\alpha$ -SMA reverse     | CCTCCCCTCGCCTCCCAAACAAGGAGC    |
| mouse GADPH forward             | GCCTCTGCGCCCTTGAGCTA           |
| mouse GADPH reverse             | GATGCGGCCGTCTCTGGAAC           |
| mouse intergenic region forward | GCTCCGGGTCCTATTCTTGT           |
| mouse intergenic region reverse | TCTTGGTTTCCAGGAGATGC           |
